1 **Striatal and prefrontal D2R and SERT distributions contrastingly**  
2 **correlate with default-mode connectivity**

3 **Short title: The contrasting links of D2R and SERT to the DMN**

4 Tudor M. Ionescu <sup>1</sup>, Mario Amend <sup>1</sup>, Rakibul Hafiz <sup>2</sup>, Bharat B. Biswal <sup>2</sup>, Andreas  
5 Maurer<sup>1</sup>, Bernd J. Pichler <sup>1</sup>, Hans F. Wehrl <sup>1†</sup> and Kristina Herfert <sup>1†\*</sup>

6

7

8

9

10

11

12

13

14

15

16 <sup>1</sup> Werner Siemens Imaging Center, Department of Preclinical Imaging and  
17 Radiopharmacy, Eberhard Karls University Tuebingen, Germany

18 <sup>2</sup> Department of Biomedical Engineering, New Jersey Institute of Technology,  
19 University Heights, Newark, New Jersey, USA

20 † equally contributed

21

22 Corresponding author: Prof. Dr. Kristina Herfert ([kristina.herfert@med.uni-](mailto:kristina.herfert@med.uni-tuebingen.de)  
23 [tuebingen.de](mailto:kristina.herfert@med.uni-tuebingen.de))

24 Address: Roentgenweg 13, 72076 Tuebingen, Germany, Tel: +49 7071 29 87680

## 25 **Abstract**

26 The molecular substrate of resting-state functional connectivity (rs-FC) remains  
27 poorly understood. We aimed to elucidate interactions of dopamine D2 receptor  
28 (D2R) and serotonin transporter (SERT) availabilities in main dopaminergic and  
29 serotonergic projection areas with the default-mode network (DMN) and two other  
30 resting-state networks (RSNs), the salience (SN) and sensorimotor networks (SMN).  
31 We performed simultaneous PET/fMRI scans in rats using [<sup>11</sup>C]raclopride and  
32 [<sup>11</sup>C]DASB to image D2R and SERT distributions, showing for the first time direct  
33 relationships between rs-FC and molecular properties of the rodent brain. We found  
34 negative associations between CPu D2R availability and all RSNs investigated.  
35 Strikingly, medial prefrontal SERT correlated both positively with anterior DMN rs-FC  
36 and negatively with rs-FC between the other networks, underlining serotonin's  
37 intricate role in this region. By further elucidating the link between molecular brain  
38 properties and its network-level function, our data support future diagnostic and  
39 therapeutic strategies.

## 40 **Teaser**

41 Simultaneous PET/fMRI indicates direct associations between monoaminergic  
42 neurotransmission and brain functional networks.

## 43 **Keywords**

44 Resting-State Functional Connectivity, Monoamines, D2 receptor, Serotonin  
45 Transporter, Simultaneous PET/fMRI

## 46 **Introduction**

47 Resting-state functional connectivity (rs-FC) derived from functional magnetic  
48 resonance imaging (fMRI) studies has emerged as a promising biomarker to assess  
49 brain function and dysfunction over the last two decades [1]. While rs-FC has already  
50 been proven to be a valuable tool for the basic understanding of brain pathology [2],  
51 there are still many unresolved aspects regarding its emergence and modulation.  
52 One important, still not elucidated question is the modulatory role of  
53 neurotransmitters and receptors on rs-FC. In most studies, pharmacological MRI (ph-  
54 MRI) has been used to investigate the impact of neurotransmitters on rs-FC [3, 4].

55 However, its output reflects the active pharmacological manipulation of the entire  
56 brain rather than the effects of intrinsic regional dependencies between  
57 neurotransmitter signaling and rs-FC. To this extent, PET/fMRI studies are a powerful  
58 approach to investigate brain network modulation by different neurotransmitter  
59 systems [5-9]. However, only a few studies have employed simultaneous PET/fMRI,  
60 a prerequisite for an accurate temporal and spatial cross-correlation [5, 7].  
61 Here, we present the first simultaneous PET/fMRI approach in rats to delineate the  
62 relations between regional D2 receptor (D2R) and serotonin transporter (SERT)  
63 availabilities studied with PET and RSNs studied with fMRI. Recently, Conio et al.  
64 revealed opposing roles of dopamine (DA) and serotonin (5-HT) on three human  
65 RSNs: the default-mode network (DMN), postulated to be involved in functions such  
66 as self-reference, memory formation and imagination [10], the sensorimotor network  
67 (SMN), regulating sensory processing [11] and the salience network (SN), playing  
68 important roles in salience attribution and reward and being assumed to mediate the  
69 interplay between the DMN and task-positive networks such as the SMN [12, 13].  
70 In the study by Conio et al., the authors investigated the effects of monoaminergic  
71 synthesis in the raphé nuclei and substantia nigra on the mentioned RSNs [14]. Here,  
72 we selected the same three RSNs for investigation in our study, focusing on the  
73 DMN, due to its prominent role in different pathologies [2, 11, 15]. However, in  
74 contrast to the paper by Conio et al., we aimed to elucidate the correlations of D2R  
75 and SERT distributions in the caudate putamen (CPu) and medial prefrontal cortex  
76 (mPFC), two of the most prominent dopaminergic and serotonergic projection areas.  
77 Our preclinical data acquired using uniform cohorts regarding age, strain, gender,  
78 nutrition, and living conditions are likely to reflect correlations driven by intrinsic  
79 differences between individual subjects. We chose to focus on DA and 5-HT due to  
80 their modulatory role in several important brain functions, such as motor control,  
81 motivation, mood, and emotion and thus their involvement in different  
82 neurodegenerative and psychiatric diseases such as Parkinson's disease (PD) and  
83 major depressive disorder (MDD) [14, 16, 17]. Insight into the intrinsic correlations of  
84 D2R and SERT with rs-FC may improve therapy and drug development for such  
85 pathologies.

## 86 **Results**

87 The results indicate inter-subject correlations between rs-FC and [<sup>11</sup>C]raclopride and  
88 [<sup>11</sup>C]DASB BP<sub>nd-norm</sub> values in the CPU and mPFC. The significances depicted were  
89 calculated at  $p < 0.05$  (both uncorrected and FDR-corrected using Benjamini-  
90 Hochberg, please refer to corresponding figure legends). For more detailed  
91 information, correlations with significances of  $p < 0.01$  and  $p < 0.001$  are indicated in  
92 the *Supplementary Information* for all presented matrices.

### 93 **D2 receptor availability in CPU correlates with widespread reduced rs-FC**

94 Due to the importance of dopamine in the CPU in modulating brain function, we  
95 aimed to elucidate the intrinsic correlation of D2R availability in this region to the rs-  
96 FC of the DMN, SN and SMN.

97 Increased D2R availability was associated with reduced rs-FC between all three  
98 analyzed networks, as depicted in Figure 2. On edge level (Figure 2A), most  
99 significant correlations involved the mPFC (23 decreased edges) and PaC (35  
100 decreased edges) in the DMN, Cg (21 decreased edges) and Ins (29 decreased  
101 edges) in the SN and the CPU (27 decreased edges), M1 (36 decreased edges) and  
102 S1 (36 decreased edges) in the SMN.

103 SN and SMN within-network strengths (Figure 2B) were anti-correlated to the D2R  
104 availability in the CPU ( $r = -0.52$  ( $p < 0.05$ , FDR-corrected) for SN and  $r = -0.53$  ( $p <$   
105  $0.05$ , FDR-corrected) for SMN). Similarly, the between-network connectivity was  
106 decreased for each pair of networks ( $r = -0.45$  ( $p < 0.05$ , FDR-corrected) between  
107 DMN and SN,  $r = -0.46$  ( $p < 0.05$ , FDR-corrected) between DMN and SMN;  $r = -0.51$   
108 ( $p < 0.05$ , FDR-corrected) between SN and SMN).

109 The correlations calculated for within-network and between-network node strengths  
110 and CPU D2R availabilities also included significant values for all three networks  
111 (Figure 2C). The connectivity strengths of six regions, including mPFC, PaC, Ins,  
112 CPU, M1 and S1 to all three networks were significantly anti-correlated to D2R  
113 binding the striatum ( $p < 0.05$ , FDR-corrected). The strongest negative correlations  
114 were observed for the SMN, ranging up to  $r = -0.63$  for the rs-FC of PaC, a total of  
115 nine regions being negatively correlated with the SMN at a significance threshold of  $p$   
116  $< 0.05$  including FDR correction ( $r = -0.48$  for mPFC,  $r = -0.42$  for CA1,  $r = -0.44$  for  
117 NAc,  $r = -0.45$  for Cg,  $r = -0.53$  for Ins,  $r = -0.52$  for CPU,  $r = -0.57$  for M1,  $r = -0.58$  for

118 S1). The node strengths of the same regions to the SN, with the exception of the  
119 Amyg, also correlated with CPu [11C]raclopride binding at  $p < 0.05$  with FDR  
120 correction, the correlation coefficients ranging up to  $r = -0.60$  for PaC and  $r = -0.58$  for  
121 S1. The node strengths of seven regions to the DMN correlated significantly ( $p <$   
122  $0.05$ , FDR correction) with CPu D2R density (ranging from  $r = -0.42$  for Amyg to  $r = -$   
123  $0.51$  for M1).

## 124 **Medial prefrontal D2R correlates negatively with rs-FC of regions involved in** 125 **cognitive control**

126 We investigated the relationships between medial prefrontal D2R availability and rs-  
127 FC due to the reported role of dopamine in cognitive control mediated by this brain  
128 region.

129 Compared to the widespread relationships between D2R binding in the CPu and rs-  
130 FC (Figure 2A-C), the correlations observed between medial prefrontal  
131 [<sup>11</sup>C]raclopride  $BP_{ND-norm}$  values and the rs-FC of the three analyzed RSNs were  
132 sparse and to a large extent involved the DMN (Figure 2D-F). Specifically, 45 of the  
133 52 edges significantly anti-correlated to D2R availability involved at least one region  
134 belonging to the DMN (Figure 2D). The strongest correlations occurred for the edges  
135 between mPFC and MC (up to  $r = -0.53$ ,  $p < 0.05$ , FDR-corrected).

136 On network level (Figure 2E), the medial prefrontal D2R availability was significantly  
137 anti-correlated with the within-network DMN rs-FC strength ( $r = -0.40$ ,  $p < 0.05$ ), as  
138 well as the rs-FC between DMN and SMN ( $r = -0.40$ ,  $p < 0.05$ ). Connectivity  
139 strengths within and between SN and SMN did not correlate significantly with medial  
140 prefrontal D2R binding.

141 The within-network strengths of three posterior DMN regions were associated with  
142 increased D2R binding in the mPFC (Figure 2F), including RS ( $r = -0.38$ ,  $p < 0.05$ ),  
143 CA1 ( $r = -0.41$ ,  $p < 0.05$ ) and CA1-p ( $r = -0.38$ ,  $p < 0.05$ ). In addition, decreased  
144 connectivity to the DMN was detected in the CPu ( $r = -0.37$ ,  $p < 0.05$ ), belonging to  
145 as well as in the S1 ( $r = -0.37$ ,  $p < 0.05$ ) and Th ( $r = -0.40$ ,  $p < 0.05$ ), all regions being  
146 part of the SMN. In contrast, only the rs-FC of CA1-p ( $r = -0.41$ ,  $p < 0.05$ ) to the SN,  
147 as well as the rs-FC of mPFC ( $r = -0.41$ ,  $p < 0.05$ ) and CA1 ( $r = -0.43$ ,  $p < 0.05$ )  
148 correlated negatively with increased medial prefrontal D2R availability.

## 149 **SERT availability in the CPU negatively correlates with SN connectivity**

150 Correlations of SERT availability in the CPU with rs-FC were subtle and mainly  
151 restricted to SN connectivity. Specifically, negative correlations were found between  
152 SERT availability and 7 out of 28 edges in the SN. Five edges of the NAc and Ins  
153 respectively to other SN regions were significantly decreased ( $p \leq 0.05$ , Figure 3A).  
154 Additionally, NAc and Ins edges to regions outside the SN including CPU, S1 and  
155 RS correlated negatively with SERT availability in the CPU. Finally, 3 out of 4 edges  
156 between the CPU itself and S1 correlated negatively with SERT availability. The  
157 sparse edge-wise correlations did not however translate to correlations with either  
158 within or between-network rs-FC (Figure 3B). Nonetheless, the integration of NAc  
159 and Ins within the SN correlated negatively with SERT availability in the CPU ( $p <$   
160  $0.05$ , Figure 3C). Interestingly, multiple edges involving DMN rs-FC correlated  
161 positively, though not significantly with SERT density in the striatum, in contrast to the  
162 negative correlations observed between striatal SERT availability and salience rs-FC  
163 and to a lesser extent SMN rs-FC.

## 164 **Prefrontal SERT specifically increases anterior DMN rs-FC**

165 Expressing the highest [ $^{11}\text{C}$ ]DASB binding of the entire cortex, we evaluated the  
166 mPFC to elucidate whether its SERT availability correlates with the rs-FC of the  
167 DMN, SN and SMN (Figure 3D-F).

168 The correlations of the investigated edges with medial prefrontal SERT availability  
169 were heterogeneous (Figure 3D). Specifically, the short-range rs-FC within the  
170 anterior DMN comprised of mPFC and OFC correlated positively with [ $^{11}\text{C}$ ]DASB  
171 binding, reaching up to  $r = 0.45$  ( $p < 0.05$ ) between left and right mPFC. In contrast,  
172 long-range rs-FC of the OFC was anti-correlated to mPFC SERT within the DMN to  
173 PaC and RS ( $r = -0.49$ ,  $p < 0.01$  between right OFC and right RS) as well as to the  
174 SMN regions CPU ( $r = -0.43$ ,  $p < 0.05$  between left OFC and CPU), M1 and S1 ( $r = -$   
175  $0.5$ ,  $p < 0.01$  between right OFC and right S1). Further negative correlations were  
176 found for edges between RS and regions belonging to the SN, such as NAc ( $r = -$   
177  $0.45$ ,  $p < 0.05$  for right RS – left NAc), Amyg ( $r = -0.41$ ,  $p < 0.05$  for right RS – left  
178 Amyg), or Ins ( $r = -0.5$ ,  $p < 0.01$  for right RS – right Ins). Finally, several edges  
179 involving both SN and SMN nodes were significantly reduced at higher medial  
180 prefrontal SERT availabilities. Most prominently, 16 edges of the Ins to regions

181 including RS, Amyg, Cg, CPu, M1 and S1 were decreased. Additionally, mPFC  
182 [<sup>11</sup>C]DASB binding was negatively correlated with 14 S1 edges to regions such as  
183 OFC, Amyg, Cg, Ins, CPu and M1.

184 On a network level the rs-FC between SN and SMN was reduced significantly ( $r = -$   
185  $0.36$ ,  $p < 0.05$ ) by increasing SERT availability in the mPFC (Figure 3E). The rs-FC  
186 between and within the other RSNs was not significantly associated to SERT levels  
187 in this region. Finally, Figure 3C indicates significant correlations between region-  
188 wise rs-FC to the three RSNs and medial prefrontal SERT availability. The Ins was  
189 the only region with significantly anti-correlated rs-FC to the DMN ( $r = - 0.37$ ,  $p <$   
190  $0.05$ ) and the only node with significantly decreased rs-FC to all three RSNs ( $r =$   
191  $0.38$ ,  $p < 0.05$  to the SN and  $r = 0.5$ ,  $p < 0.01$  to the SMN) associated with increased  
192 medial prefrontal SERT availability. Five regions, including RS, Cg, M1 and S1 in  
193 addition to Ins had significantly lower rs-FC strength to the SN, while OFC ( $r = -0.44$ ,  
194  $p < 0.05$ ), M1 and S1 (both  $r = -0.38$ ,  $p < 0.05$ ) were significantly less connected to  
195 the SMN at increasing [<sup>11</sup>C]DASB bindings in the mPFC.

196 We further elucidated the way prefrontal SERT binding shifts the rs-FC balance  
197 towards the anterior DMN, by calculating the correlation of medial prefrontal  
198 [<sup>11</sup>C]DASB binding with the difference of the average rs-FC within the anterior DMN  
199 and the average rs-FC between the anterior DMN and the posterior DMN, SN and  
200 SMN (please refer to *Supplementary Information*). This analysis yielded a highly  
201 significant correlation value of  $r = 0.63$  ( $p = 0.0003$ ), emphasizing the shift in  
202 processing balance by the corroborated positive correlation of the anterior DMN  
203 within-network rs-FC with the negative correlation of the anterior DMN between-  
204 network rs-FC with medial prefrontal SERT binding.

## 205 **Discussion**

206 Elucidating the link between molecular variations of brain receptors and transporters  
207 and macroscale metrics such as rs-FC will primarily enhance our understanding  
208 about drug mechanisms of action and several brain pathologies. Here we show that  
209 D2R and SERT availabilities correlate with rs-FC in a regionally specific manner in  
210 the healthy rat brain (see Figure 4 for a summary of the findings).



211 **D2 receptor density in the CPU is negatively correlated with rs-FC across all**  
212 **RSNs**

213 DA and the mesolimbic system in particular, expressing the highest density of  
214 dopaminergic receptors, are of paramount importance for numerous neurological  
215 disorders for which rs-FC can serve as a biomarker [18]. The D2Rs investigated in  
216 the present study using [<sup>11</sup>C]raclopride drive the indirect striatal pathway, a circuit  
217 involved in the inhibition of motor activity via the ventrolateral nucleus of the thalamus  
218 postulated to be heavily involved in PD [19, 20]. PET studies using [<sup>11</sup>C]raclopride  
219 have been shown to provide an indirect measure of synaptic dopamine availability  
220 with a decrease in [<sup>11</sup>C]raclopride binding reflecting an increase in synaptic dopamine  
221 concentrations due to a higher occupancy at the receptor and vice versa [21]. Thus,  
222 a higher D2R availability reflects a lower synaptic dopamine content, which may  
223 impact rs-FC in downstream pathways. The largest decrease associated with higher  
224 D2R availability in the caudate putamen observed in our study occurred in the SMN,  
225 in line with the increased activity of the indirect pathway mediated by higher D2R  
226 densities. However, our data also suggests reduction in DMN and SN rs-FC. Regions  
227 comprising these networks may be mediated along different pathways by striatal  
228 D2Rs, as shown previously [22]. Specifically, striatal D2R overexpression in mice has  
229 been shown to modulate ventral tegmental activity [23]. One of the effects of this  
230 modulation is the impairment of functional connectivity between VTA and mPFC,  
231 resulting in abnormal prefrontal processing and affecting working memory [24].  
232 Intriguingly, the connectivity between the medial prefrontal cortex and other areas  
233 correlated strongly to D2R availability in the caudate putamen in our study, in line  
234 with the reports discussed above.

235 To the best of our knowledge, the only simultaneous PET/fMRI study up to date  
236 which explored the correlation of rs-FC with receptor variability employed  
237 [<sup>11</sup>C]NNC112, a dopamine D1 receptor PET ligand in the human brain [5]. The  
238 primary finding of this study was a correlation between D1R cortical density and the  
239 functional connectivity between DMN and the frontoparietal network during a working  
240 memory task. Intriguingly, the authors also found a significant negative correlation  
241 between striatal D1R availability and rs-FC between left and right mPFC. While our  
242 data reveal large-scale decoupling of the mPFC from several other regions at  
243 increased striatal D2R densities, the rs-FC between left and right mPFC did not



244 correlate with D2R in the striatum. These findings indicate that future studies  
245 assessing both D1R and D2R availability are required to accurately delineate their  
246 combined interaction with rs-FC.

247 Another study, applying PET and fMRI sequentially rather than simultaneously in  
248 humans, focused on the effects of both DA synthesis using [<sup>18</sup>F]DOPA and release  
249 capacity using [<sup>11</sup>C]-(+)-PHNO on rs-FC in placebo and dexamphetamine challenge  
250 studies [6]. While [<sup>18</sup>F]DOPA PET as a marker of presynaptic aromatic amino acid  
251 decarboxylase (AADC) activity is not linked to a particular receptor subtype, [<sup>11</sup>C]-(+)-  
252 PHNO binds specifically to D2/3 receptors, similarly to [<sup>11</sup>C]raclopride in our study.  
253 The data showed that DA release capacity to D2/3 receptors in the CPu was  
254 negatively correlated to the salience network connectivity, which is in line with our  
255 findings, indicating the translatability of this study design among species.  
256 Interestingly, in the above-mentioned study DA synthesis capacity correlated with  
257 increased salience rs-FC. The authors corroborated their findings to the hypothesis  
258 that DA synthesis reflects a general dopaminergic tone that would be necessary for  
259 the attribution of salience, while DA release would indicate spontaneous stimulus-  
260 independent firing mediating aberrant attributions of salience. Our data thus support  
261 the mentioned hypothesis. Additionally, the authors also discussed the possibility of  
262 the preferential binding of the agonist [<sup>11</sup>C]-(+)-PHNO tracer they used to high-affinity  
263 D2R [25] having an effect on their readout. To this extent they proposed the use of  
264 an antagonist tracer for further elucidation of this aspect. The similarity of our readout  
265 using [<sup>11</sup>C]raclopride, a D2 antagonist tracer, complements the findings using [<sup>11</sup>C]-  
266 (+)-PHNO indicating that the proportion of high-affinity D2R does not have a major  
267 impact on the readout in this case.

### 268 **Medial prefrontal D2R availability is associated with reduced DMN connectivity**

269 Several reports have suggested an essential role of DA in the prefrontal cortex, an  
270 associative cortical area involved in the top-down control of several cognitive  
271 mechanisms [26]. The balance between D1 and D2 receptors available in this region  
272 has been linked to normal brain function and is postulated to play a critical role in  
273 psychiatric diseases such as schizophrenia [27]. It is assumed that D1 and D2  
274 receptors play complementary roles in functions such as associative learning, with  
275 D2R promoting cognitive flexibility. Thus, increased prefrontal D2R availability  
276 destabilizes network states promoting flexible behavior [28-30]. This hypothesis is

277 supported by our findings, indicating a decrease in rs-FC, especially in the DMN, a  
278 network postulated to be heavily involved in cognitive control.

### 279 **Striatal SERT subtly impacts salience network circuitry**

280 While serotonergic innervation in the striatum by the raphé nuclei has been  
281 demonstrated [31], the role of serotonin in the striatum remains largely elusive. Early  
282 studies have indicated a dose-dependent interaction between exogenous serotonin  
283 and dopaminergic activity [32]. However, when compared to the concentrations of at  
284 least 100 nM assessed as having an effect on dopaminergic activity [33], the  
285 endogenous levels of serotonin determined in the striatum at resting state (0.5 – 2  
286 nM) appear insufficient to directly impact dopaminergic activity in this region [32],  
287 which may explain the relatively sparse correlations observed here between SERT  
288 density and rs-FC. Nonetheless, other studies have suggested that the effect of  
289 serotonin in the striatum may be mediated by additional factors, such as a state  
290 dependence of dopaminergic neurotransmission [32] or by interactions with other  
291 neurotransmitter systems altogether [34].

292 The hypothesis indicating a subtle, yet physiologically significant role of serotonin in  
293 the striatum is supported by macroscale findings, including those generated by rs-FC  
294 studies. Specifically, decreased FC between the raphé nuclei and the striatum has  
295 been associated with decreased connectivity of the salience network with subcortical  
296 regions in schizophrenia [35]. The significant effects observed in the present study  
297 mirror the findings by Han et al. [35], being largely confined to salience connectivity.  
298 Potential pathological roles of such correlations include the postulated aberrant  
299 salience attribution in schizophrenia, as well as the reported deficient motivation [35],  
300 a hypothesis supported by the significantly decreased rs-FC strength of the nucleus  
301 accumbens within the salience network found in our study. Intriguingly, similar  
302 findings of decreased salience rs-FC have been associated with increased D2  
303 availability in the striatum [36], which is also confirmed by the findings in the present  
304 study. Therefore, our data indicate that striatal D2R and SERT densities have similar  
305 effects on the salience network in particular, both being anti-correlated with its rs-FC.  
306 However, two aspects must be underlined. First, our data indicate that striatal D2R  
307 correlations with rs-FC are stronger than those of SERT and also involve the two  
308 other investigated networks. As a side note, although not achieving significance, the  
309 positive correlations observed between striatal SERT and anterior DMN rs-FC in the

310 present study antagonize its negative correlations with salience rs-FC and suggest  
311 that the role of serotonin in this region may be network-dependent. Secondly,  
312 potential direct interactions between SERT and D2R in the striatum have not been  
313 elucidated in the present study. Due to the similar effects of D2R and SERT  
314 underlined above, future studies assessing both parameters along with rs-FC in the  
315 same cohort are of interest to elucidate potential three-way interactions.

### 316 **Medial prefrontal SERT density has opposing effects on anterior and posterior** 317 **default-mode connectivity**

318 Our data indicate that SERT availability in the mPFC has a heterogeneous impact on  
319 rs-FC, localized positive correlations in the anterior DMN being corroborated with  
320 more widespread negative correlations in the SN and SMN.

321 The associations observed in the present study could provide important insights for  
322 MDD and related disorders, which are associated with disrupted serotonergic  
323 neurotransmission. In MDD, cortical 5-HT levels are believed to be decreased, one of  
324 the possible causes being an increased expression of SERT [37-39]. Due to the  
325 rostro-caudal gradient in serotonergic innervation it is widely postulated that 5-HT in  
326 the prefrontal cortex may play an essential role in rs-FC modulation and thereby in  
327 numerous psychiatric diseases including MDD [26, 40]. In MDD, most rs-FC research  
328 has focused on the DMN, a network associated with a state of enhanced rumination.  
329 Taken together, past studies indicate increased rs-FC in frontal areas corroborated  
330 with decreases in the posterior default-mode hubs [15]. In line with these findings, we  
331 demonstrate an increased local rs-FC within the prefrontal cortex associated at  
332 elevated medial prefrontal SERT availability and concurrent with decreased rs-FC in  
333 the posterior DMN, as well as in the SMN and SN.

334 Further evidence indicating the prominent role of the prefrontal cortex in depression  
335 is provided by acute tryptophan depletion (ATD) [41, 42] and selective serotonin  
336 reuptake inhibitors (SSRI) studies. Briefly, both ATD and single-dose SSRI  
337 administration have been shown to increase local prefrontal rs-FC by decreasing  
338 serotonergic levels [43, 44]. In contrast, chronic SSRI medication reduced  
339 pathologically altered rs-FC of the medial prefrontal cortex in MDD [45, 46]. Our data  
340 indicating an increased local prefrontal rs-FC and decreased rs-FC in posterior DMN,  
341 as well as in the SN and SMN at higher prefrontal SERT levels are in line with  
342 previous studies. A localized prefrontal rs-FC increase with its concurrent dissociation

343 from most other areas of the brain may indicate an enhanced state of rumination  
344 corroborated with a loss of top-down control and regulation [46-50]. Another  
345 interesting aspect of our data is the decoupling of the insular cortex from all RSNs  
346 and most strongly from the task-positive SMN at increased prefrontal SERT  
347 densities. Being the main hub of the salience network, this finding may suggest that  
348 disturbed regulation of DMN-SMN balance, one of the main functions of the SN [14,  
349 51], is at least in part associated with prefrontal serotonergic function.

350 Using sequential [<sup>11</sup>C]WAY-100635 PET/fMRI Hahn et al. investigated the  
351 modulations of the DMN by regional 5-HT<sub>1A</sub> receptor availabilities [8]. The authors  
352 found reduced DMN rs-FC at increased 5-HT<sub>1A</sub> receptor binding in the dorsal medial  
353 prefrontal cortex, in line with our results using [<sup>11</sup>C]DASB. However, when comparing  
354 the study by Hahn et al. with the present study, it should be kept in mind that Hahn et  
355 al. investigated correlations between rs-FC and a single 5-HT receptor subtype. The  
356 effects of 5-HT are mediated via at least 14 5-HT receptor subtypes, investigating a  
357 single 5-HT receptor subtype provides only one possible modulation of the rs-FC  
358 elicited by 5-HT [26], while imaging SERT availability as done in our study may  
359 represent a more general reflection of regional serotonergic tone. The two  
360 approaches should be seen as complementary and future studies investigating the  
361 influence of both SERT and different 5-HT receptors on rs-FC will further enhance  
362 our understanding of the serotonergic system.

### 363 **Serotonergic and dopaminergic correlations with rs-FC**

364 Our data shows that individual variations of regional D2R and SERT availabilities at  
365 rest correlate with different aspects of the analyzed RSNs. The recent study by Conio  
366 et al. indicated specific, mainly opposite roles of the two neurotransmitters in the  
367 modulation of DMN, SN and SMN [14]. However, the authors mainly focused on the  
368 correlation between rs-FC and neurotransmitter synthesis at the raphé nuclei and  
369 substantia nigra. Our study complements the proposed model by showing that the  
370 availabilities of receptors in projection areas also play essential roles in the way the  
371 respective neurotransmitters modulate rs-FC. Specifically, we found that the rs-FC of  
372 main functional hubs, well-connected regions known to both receive projections and  
373 send afferents to widely distributed brain areas correlate strongest with their  
374 respective D2R or SERT availabilities. The CPu is a main hub of the basal ganglia  
375 [52], known to modulate motor functions via the cortico-striato-thalamic loop [11], but

376 also salience and prefrontal function via the VTA [24]. The mPFC is the main hub of  
377 working memory and attention, integrating inputs from multiple sensory modalities  
378 [47]. Moreover, monoaminergic function in these regions is at the center of various  
379 diseases. Dopamine in the caudate putamen plays an essential role in PD [20], while  
380 striatal SERT has been reported to play an important role in schizophrenia. Medial  
381 prefrontal serotonergic dysfunction is related to MDD [53], and dopaminergic  
382 imbalance in the mPFC is postulated to drive schizophrenia [54]. Our data show the  
383 importance of monoamines in these hubs not only for their own function but for the  
384 modulation of the most important RSNs of the brain. Additionally, the complementing  
385 associations of prefrontal D2R and SERT with the analyzed RSNs indicate that the  
386 interplay of DA and 5-HT is likely to be paramount to medial prefrontal function and to  
387 the RSNs modulated by it, primarily the DMN.

388 Future studies will be required to further investigate the mechanisms underlying the  
389 observed correlations. Importantly, as opposed to neurotransmitters such as the  
390 mainly excitatory glutamate or the mainly inhibitory GABA, DA and 5-HT modulate  
391 brain function heterogeneously [55]. The heterogeneity of the modulatory effects may  
392 stem from the various DA and 5-HT receptor subtypes interacting with glutamate and  
393 GABA in differing manners and their different distributions across the brain. For  
394 example, in the case of 5-HT, presynaptic 5-HT<sub>1A</sub>, 5-HT<sub>1B</sub> and 5-HT<sub>6</sub> receptors have  
395 been shown to decrease glutamate release, while 5-HT<sub>3</sub> receptors increase the  
396 release of glutamate. 5-HT<sub>2</sub> receptors increase GABA release and can reduce or  
397 enhance glutamate release depending on the region [55]. Intriguingly, several studies  
398 have suggested a relationship between DA and 5-HT in disease, reward and  
399 addiction [56, 57]. Anatomically, it has been shown that the raphé nuclei send  
400 serotonergic projections to the ventral tegmental area [57, 58], while in turn receiving  
401 top-down afferents from the prefrontal cortex [53] and other areas [59, 60].  
402 Additionally, the VTA also receives top-down input from the mPFC [60, 61]. In our  
403 study, additional analysis showed medial prefrontal SERT availability correlated  
404 positively with the short-path rs-FC between VTA and MB. This finding hints towards  
405 the role of serotonergic prefrontal top-down modulation on the relationship between  
406 the raphé nuclei and the VTA and conversely may represent one of the ways of  
407 interaction between serotonergic and dopaminergic neurotransmission. Such  
408 complex loops mediated by several regions and neurotransmitters may be further  
409 elucidated by PET/fMRI studies employing several tracers in the same cohort.

## 410 **Limitations and general remarks**

411 Our study is the first exploring the correlation of molecular receptor and transporter  
412 availability with RSNs using a simultaneous PET/fMRI approach in rats. As the data  
413 were acquired under anesthesia, this effect needs to be taken into account for the  
414 interpretation of results. While the anesthesia was kept at levels recommended  
415 previously [62] and shown to enable stable physiological readouts [63], some  
416 confounding effects cannot be excluded for either of the fMRI [62], [<sup>11</sup>C]raclopride  
417 [64] or [<sup>11</sup>C]DASB readouts [65]. However, performing such experiments in small  
418 laboratory animals opens up the great opportunity to study such interactions under  
419 very controlled conditions and maximized cohort uniformity. Factors such as nutrition,  
420 lifestyle, age or gender known to impact D2R and SERT availabilities in a regionally  
421 specific manner [66, 67] can be excluded when interpreting the observed  
422 correlations, thereby enabling an inherently complementary readout to human  
423 studies.

424 Furthermore, some of the correlations presented in our study are moderate and did  
425 not survive FDR correction. Two factors may represent possible causes for this issue.  
426 First, compared to large clinical studies, the sizes of our cohorts are relatively limited.  
427 Second, D2R and SERT densities are not the sole modulators of rs-FC, other  
428 neurotransmitters and receptor types probably having as of yet undiscovered  
429 associations with rs-FC. Therefore, our study sheds light on a part of the picture of  
430 interactions between neurotransmitter systems and rs-FC; similarly designed studies  
431 are still required to thoroughly elucidate this aspect. Importantly, PET/fMRI offers the  
432 possibility to generate multi-level data on this very complex matter. In future, a  
433 PET/fMRI database, similar to already existing fMRI databases, may be of interest for  
434 potential large cohort meta-analyses to this extent. Since most psychiatric  
435 medications aim to normalize brain function by interacting with certain receptors or  
436 transporters, applying novel analysis methods, as well as machine learning  
437 approaches to this type of data can help understand the link between molecular  
438 changes and functional changes in the brain, enable the accurate prediction of drug  
439 therapies and improve development of treatment strategies for psychiatric disorders.



## 440 **Conclusion**

441 Here we present that the local availability of D2R and SERT have regionally specific  
442 fingerprints on RSNs. We apply a novel analysis method of simultaneously acquired  
443 PET/fMRI data in rats which enables to investigate the modulatory role of  
444 neurotransmitter systems on rs-FC at baseline levels. Further studies exploring the  
445 correlations of other neurotransmitter systems such as norepinephrine with rs-FC will  
446 be of great value to elucidate their respective influence on brain function. Future  
447 similarly designed studies may improve the general understanding of brain function  
448 on several levels, as well as the development of novel drug therapies for several  
449 psychiatric diseases.

## 450 **Materials and Methods**

### 451 **Animals**

452 Male Lewis rats (n = 59) provided by Charles River Laboratories (Sulzfeld, Germany)  
453 were divided into two cohorts for [<sup>11</sup>C]raclopride (365 ± 49 g, n = 29) and [<sup>11</sup>C]DASB  
454 (354 ± 37 g, n = 30, see *Supplementary Figure 1* for the rat weights). These weights  
455 corresponded to ages of approximately 15 weeks. The rats were kept on a 12-hour  
456 day-night cycle at a room temperature of 22 °C and 40-60% humidity and received  
457 standard chow food and water *ad-libitum*. All experiments were conducted according  
458 to the German federal regulations regarding use and care of experimental animals  
459 and were approved by the local authorities (Regierungspräsidium Tübingen).

460 Initially, a total of 50 rats were scanned using [<sup>11</sup>C]DASB and 37 rats were scanned  
461 using [<sup>11</sup>C]raclopride. 20 scans of the [<sup>11</sup>C]DASB cohort and 8 scans of the  
462 [<sup>11</sup>C]raclopride cohort had to be excluded due to either motion, insufficient tracer  
463 specific activity, paravenous catheters or image artifacts.

### 464 **Radiotracer synthesis**

465 For a detailed account of radiotracer synthesis, please refer to *Supplementary*  
466 *Methods*.

467 The radioactive tracers had molar activities of 83 ± 29 GBq/μmol for [<sup>11</sup>C]raclopride  
468 57 ± 37 GBq/μmol for [<sup>11</sup>C]DASB at the start of the PET acquisition (*Supplementary*  
469 *Figure 2B and C*).



## 470 **Simultaneous PET/MRI experiments**

471 Anesthesia was induced in knock-out boxes by delivering 3 % isoflurane in regular air  
472 until reflex tests indicated sufficient sedation. For the following preparation steps the  
473 concentration of isoflurane was reduced to 2 %. The weights of the animals were  
474 measured and a catheter was placed into a tail vein using a 30 G needle for tracer  
475 administration. Subsequently, the rats were transferred onto a dedicated feedback  
476 temperature-controlled rat bed (Medres, Cologne, Germany). A rectal probe was  
477 positioned to monitor and maintain a stable body temperature at 36.5° C and a  
478 breathing pad was used to observe respiration rates. Finally, the animals were  
479 introduced into the PET/MRI scanner and the isoflurane concentration was reduced  
480 to 1.3 % during the scan.

481 The scans were acquired using a small-animal 7 T ClinScan scanner (Bruker BioSpin  
482 MRI, Bruker, Ettlingen, Germany) with a linearly polarized RF coil (Bruker) of 72 cm  
483 in diameter for transmission and a four channel rat brain coil (Bruker) for reception.  
484 Localizer scans were first acquired to accurately position the rat brains into the center  
485 of the PET/MRI field of view. Subsequently, local field homogeneity was optimized by  
486 measuring local magnetic field maps. Anatomical reference scans were then  
487 performed using T2-weighted MRI sequences (TR: 1800 ms, TE: 67.11 ms, FOV: 40  
488 x 32 x 32 mm<sup>3</sup>, image size: 160 x 128 x 128 px, Rare factor: 28, averages: 1). Finally,  
489 T2\*-weighted gradient echo EPI sequences (TE: 18 ms, TR: 2500 ms, 0.25 mm  
490 isotropic resolution, FoV 25 x 23 mm<sup>2</sup>, image size: 92 x 85 x 20 px, slice thickness:  
491 0.8 mm, 20 slices) were acquired for functional MR imaging.

492 A small-animal PET insert developed in cooperation with Bruker (Bruker Biospin,  
493 Ettlingen Germany) was used for [<sup>11</sup>C]DASB and [<sup>11</sup>C]raclopride acquisitions. This  
494 insert is the second generation of a PET insert developed in-house described  
495 previously [68]. Both PET inserts have similar technical specifications. The  
496 radioactive tracers were applied via a bolus plus constant infusion protocol with a  $K_{bol}$   
497 of 38.7 minutes using an initial bolus of  $341 \pm 65.2$  MBq for [<sup>11</sup>C]raclopride and  $152 \pm$   
498  $44$  MBq for [<sup>11</sup>C]DASB in a volume of 0.48 ml over 20 seconds, followed by a  
499 constant infusion of 15  $\mu$ l/min until the end of the scan. PET/fMRI acquisition was  
500 started simultaneously with the tracer injection and was performed over a period of  
501 80 minutes. The PET data were saved as list-mode files and reconstructed using an  
502 ordered-subsets expectation maximization 2D (OSEM-2D) algorithm written in-house.

## 503 **Data preprocessing**

504 Preprocessing was performed using Statistical Parametric Mapping 12 (SPM 12,  
505 Wellcome Trust Centre for Neuroimaging, University College London, London, United  
506 Kingdom) and Analysis of Functional NeuroImages (AFNI, National Institute of Mental  
507 Health (NIMH), Bethesda, Maryland, USA) as reported previously [69]. In addition,  
508 we added a nuisance removal based on a method reported elsewhere [70]. First, all  
509 fMRI scans were realigned using SPM and the three translation and three rotation  
510 motion parameters were stored. Additionally, mean images were created for all scans  
511 and used to create binary masks using AFNI. Additional binary brain masks were  
512 created for the T2-weighted anatomical MRI reference scans and the reconstructed  
513 PET scans. The masks were applied for brain extraction from all mentioned datasets.  
514 For fMRI, images containing extra-cerebral tissue were also created for later use.  
515 The skull-stripped PET and fMRI scans were then coregistered to their respective  
516 anatomical references. Afterward, the anatomical reference scans were used to  
517 calculate spatial normalization parameters to the Schiffer rat brain atlas and the  
518 obtained normalization parameters were applied to the fMRI and PET datasets.  
519 Coregistration and normalization were visually evaluated for each subject and every  
520 modality. Then, nuisance removal was performed for the fMRI scans. To this extent,  
521 a multiple linear regression model was applied containing the six motion parameters  
522 stored after initial realignment, as well as the first 10 principal components of the  
523 signal extracted from the images containing extra-cerebral tissues, as described by  
524 Chuang et al. [70]. Finally, a  $1.5 \times 1.5 \times 1.5 \text{ mm}^3$  full-width-half-maximum Gaussian  
525 kernel was applied to all fMRI and PET datasets for spatial smoothing [71].

## 526 **Data analysis**

527 In the following, an overview of the analysis of the preprocessed data is provided. A  
528 graphical description of the analysis pipeline used is shown in Figure 1.

## 529 **Functional MRI data analysis**

530 Resting-state functional connectivity was calculated using a seed-based approach in  
531 the interval from 40 to 80 minutes after scan start to ensure tracer equilibrium for PET  
532 (please refer to PET data analysis section). To this extent, 28 regions comprising the  
533 DMN, SN and SMN were selected from the Schiffer rat brain atlas (a list of the  
534 regions is provided in *Supplementary Table 1*). The SPM toolbox Marseille Boîte À

535 Région d'Intérêt (MarsBaR) was employed to extract fMRI time-courses from all  
536 regions [72]. These were then used to calculate pairwise Pearson's r correlation  
537 coefficients for each dataset, generating correlation matrices containing 28 x 28  
538 elements. Self-correlations were set to zero. The computed Pearson's r coefficients  
539 then underwent Fischer's transformation into z values for further analysis.

540 Several rs-FC metrics were computed to quantify the properties of the analyzed  
541 networks. In addition to edge-wise rs-FC, regional node strengths were calculated as  
542 the sum of all correlations of one node to the regions belonging to the same network.  
543 Inter-network node strengths were defined as the sum of the correlations of one node  
544 to the regions of another network. On a network level, within-network strengths were  
545 defined as the sum of all edges comprising a network. Between-network strengths  
546 were calculated as the sum of all correlations between two sets of regions belonging  
547 to two networks [73].

548 For a detailed report of these steps please refer to *Supplementary Methods*.

#### 549 **PET data analysis**

550 Static PET scans were reconstructed from 40 to 80 minutes after the start of the PET  
551 data acquisition to ensure tracer equilibrium between target and reference region. To  
552 enhance signal-to-noise ratios and due to the negligible differences in tracer uptake  
553 between left and right hemispheres, each bilateral region of the Schiffer rat brain  
554 atlas was merged to one volume of interest (VOI). Following preprocessing, tracer  
555 uptake values of the 27 generated VOIs were calculated for each dataset. Binding  
556 potentials ( $BP_{ND}$ ) values were computed from the DVR-1 (equation 1) using the  
557 whole cerebellum as a reference region for [ $^{11}\text{C}$ ]raclopride and the cerebellar grey  
558 matter as a reference region for [ $^{11}\text{C}$ ]DASB [74, 75].

$$559 \quad BP_{ND} = \frac{V_T - V_{ND}}{V_{ND}} = \frac{V_T}{V_{ND}} - 1 = DVR - 1,$$

560 where:

- 561 •  $BP_{ND}$  is the binding potential
- 562 •  $V_T$  is the total volume of distribution
- 563 •  $V_{ND}$  is the volume of distribution in a reference tissue
- 564 •  $DVR$  is the distribution volume ratio

565 For the generation of  $BP_{ND}$  maps, the above equation was applied for each voxel,  
566 where  $V_{ND}$  was defined as the mean uptake of all voxels included in the reference  
567 region, while  $V_T$  was the uptake of each respective voxel, resulting in single  $BP_{ND}$   
568 value for each voxel in every subject. Using the subject  $BP_{ND}$  maps group-level  $BP_{ND}$   
569 maps were calculated for both cohorts. For correlation analyses, VOI-based  $BP_{ND}$   
570 values were calculated,  $V_T$  representing the mean uptake of all voxels comprised by  
571 the respective VOI. Previous similar studies reported adjusting  $BP_{ND}$  values for mean  
572 global signal to control for global effects [5]. The mentioned study indicated the high  
573 inter-individual correlations between  $BP_{ND}$  values of different regions. Here, we  
574 reproduced the finding by calculating the correlations between regional  $BP_{ND}$  values  
575 and confirmed this observation (please refer to *Supplementary Information* for an  
576 exemplary correlation analysis between [ $^{11}C$ ]DASB bindings in the mPFC and CPu).  
577 Thus, since our aim was to elucidate the correlations of rs-FC with the distributions of  
578 either D2R or SERT binding between different regions, in our study individual  $BP_{ND}$   
579 values also underwent a global normalization for each dataset to discard such  
580 effects, generating normalized  $BP_{ND}$  values ( $BP_{ND-norm}$ ), as described in the study  
581 mentioned above [5].

## 582 **PET/fMRI data analysis**

583 To investigate the influence of [ $^{11}C$ ]raclopride and [ $^{11}C$ ]DASB in the CPu and mPFC  
584 on rs-FC, we evaluated their relationships between  $BP_{ND-norm}$  values and rs-FC  
585 measures described above. Inter-individual correlations between regional  $BP_{ND-norm}$   
586 values and rs-FC metrics were calculated using Pearson's  $r$ . This procedure was  
587 performed between each regional  $BP_{ND-norm}$  and every rs-FC metric described above  
588 to determine potential correlations between edges, regional node strengths, inter-  
589 regional node strengths, within-network strengths and between-network strengths  
590 and regional D2R or SERT densities. Additionally, the computed correlations  
591 between  $BP_{ND-norm}$  and each rs-FC metric were tested for statistical significance and  
592 a false discovery rate (FDR) correction was performed for a threshold of 0.05 using  
593 the Benjamini-Hochberg procedure.

## 594 1. Bibliography

- 595 1. Biswal B, Yetkin FZ, Haughton VM, Hyde JS. Functional connectivity in the  
596 motor cortex of resting human brain using echo-planar MRI. *Magn Reson Med.*  
597 1995;34(4):537-41. doi: 10.1002/mrm.1910340409. PubMed PMID: 8524021.
- 598 2. Badhwar A, Tam A, Dansereau C, Orban P, Hoffstaedter F, Bellec P. Resting-  
599 state network dysfunction in Alzheimer's disease: A systematic review and meta-  
600 analysis. *Alzheimers Dement (Amst).* 2017;8:73-85. doi:  
601 10.1016/j.dadm.2017.03.007. PubMed PMID: 28560308.
- 602 3. Kelly C, de Zubicaray G, Di Martino A, Copland DA, Reiss PT, Klein DF, et al.  
603 L-dopa modulates functional connectivity in striatal cognitive and motor networks: a  
604 double-blind placebo-controlled study. *J Neurosci.* 2009;29(22):7364-78. doi:  
605 10.1523/JNEUROSCI.0810-09.2009. PubMed PMID: 19494158; PubMed Central  
606 PMCID: PMC2928147.
- 607 4. Cole DM, Beckmann CF, Oei NY, Both S, van Gerven JM, Rombouts SA.  
608 Differential and distributed effects of dopamine neuromodulations on resting-state  
609 network connectivity. *Neuroimage.* 2013;78:59-67. doi:  
610 10.1016/j.neuroimage.2013.04.034. PubMed PMID: 23603346.
- 611 5. Roffman JL, Tanner AS, Eryilmaz H, Rodriguez-Thompson A, Silverstein NJ,  
612 Ho NF, et al. Dopamine D1 signaling organizes network dynamics underlying working  
613 memory. *Sci Adv.* 2016;2(6):e1501672. doi: 10.1126/sciadv.1501672. PubMed  
614 PMID: 27386561; PubMed Central PMCID: PMC4928887.
- 615 6. McCutcheon RA, Nour MM, Dahoun T, Jauhar S, Pepper F, Expert P, et al.  
616 Mesolimbic Dopamine Function Is Related to Salience Network Connectivity: An  
617 Integrative Positron Emission Tomography and Magnetic Resonance Study. *Biol*  
618 *Psychiatry.* 2019;85(5):368-78. doi: 10.1016/j.biopsych.2018.09.010. PubMed PMID:  
619 30389131; PubMed Central PMCID: PMC6360933.
- 620 7. Vidal B, Fieux S, Redouté J, Villien M, Bonnefoi F, Le Bars D, et al. In vivo  
621 biased agonism at 5-HT(1A) receptors: characterisation by simultaneous PET/MR  
622 imaging. *Neuropsychopharmacology.* 2018;43(11):2310-9. Epub 07/06. doi:  
623 10.1038/s41386-018-0145-2. PubMed PMID: 30030540.
- 624 8. Hahn A, Wadsak W, Windischberger C, Baldinger P, Höflich AS, Losak J, et  
625 al. Differential modulation of the default mode network via serotonin-1A receptors.  
626 *Proceedings of the National Academy of Sciences of the United States of America.*  
627 2012;109(7):2619-24. Epub 01/30. doi: 10.1073/pnas.1117104109. PubMed PMID:  
628 22308408.
- 629 9. Nagano-Saito A, Lissemore JI, Gravel P, Leyton M, Carbonell F, Benkelfat C.  
630 Posterior dopamine D2/3 receptors and brain network functional connectivity.  
631 *Synapse.* 2017;71(11). doi: 10.1002/syn.21993.
- 632 10. Andrews-Hanna JR. The brain's default network and its adaptive role in  
633 internal mentation. *Neuroscientist.* 2012;18(3):251-70. Epub 06/15. doi:  
634 10.1177/1073858411403316. PubMed PMID: 21677128.
- 635 11. Göttlich M, Münte TF, Heldmann M, Kasten M, Hagenah J, Krämer UM.  
636 Altered resting state brain networks in Parkinson's disease. *PloS one.*  
637 2013;8(10):e77336-e. doi: 10.1371/journal.pone.0077336. PubMed PMID: 24204812.
- 638 12. Seeley WW. The Salience Network: A Neural System for Perceiving and  
639 Responding to Homeostatic Demands. *The Journal of Neuroscience.*  
640 2019;39(50):9878-82. doi: 10.1523/jneurosci.1138-17.2019.
- 641 13. Seeley WW, Menon V, Schatzberg AF, Keller J, Glover GH, Kenna H, et al.  
642 Dissociable intrinsic connectivity networks for salience processing and executive  
643 control. *J Neurosci.* 2007;27(9):2349-56. Epub 2007/03/03. doi:



- 644 10.1523/jneurosci.5587-06.2007. PubMed PMID: 17329432; PubMed Central  
645 PMCID: PMCPMC2680293.
- 646 14. Conio B, Martino M, Magioncalda P, Escelsior A, Inglese M, Amore M, et al.  
647 Opposite effects of dopamine and serotonin on resting-state networks: review and  
648 implications for psychiatric disorders. *Mol Psychiatry*. 2019. doi: 10.1038/s41380-  
649 019-0406-4. PubMed PMID: 30953003.
- 650 15. Yan C-G, Chen X, Li L, Castellanos FX, Bai T-J, Bo Q-J, et al. Reduced  
651 default mode network functional connectivity in patients with recurrent major  
652 depressive disorder. *Proceedings of the National Academy of Sciences of the United  
653 States of America*. 2019;116(18):9078-83. Epub 04/12. doi:  
654 10.1073/pnas.1900390116. PubMed PMID: 30979801.
- 655 16. Bhagwagar Z, Whale R, Cowen PJ. State and trait abnormalities in serotonin  
656 function in major depression. *British Journal of Psychiatry*. 2018;180(1):24-8. Epub  
657 01/02. doi: 10.1192/bjp.180.1.24.
- 658 17. Roussakis A-A, Politis M, Towey D, Piccini P. Serotonin-to-dopamine  
659 transporter ratios in Parkinson disease. Relevance for dyskinesias.  
660 *2016;86(12):1152-8*. doi: 10.1212/wnl.0000000000002494.
- 661 18. Cole DM, Oei NY, Soeter RP, Both S, van Gerven JM, Rombouts SA, et al.  
662 Dopamine-dependent architecture of cortico-subcortical network connectivity. *Cereb  
663 Cortex*. 2013;23(7):1509-16. doi: 10.1093/cercor/bhs136. PubMed PMID: 22645252.
- 664 19. Smith Y, Bevan MD, Shink E, Bolam JP. Microcircuitry of the direct and  
665 indirect pathways of the basal ganglia. *Neuroscience*. 1998;86(2):353-87. Epub  
666 1999/01/09. doi: 10.1016/s0306-4522(98)00004-9. PubMed PMID: 9881853.
- 667 20. Bartels AL, Leenders KL. Parkinson's disease: The syndrome, the  
668 pathogenesis and pathophysiology. *Cortex*. 2009;45(8):915-21. doi:  
669 <https://doi.org/10.1016/j.cortex.2008.11.010>.
- 670 21. Park M-H, Park E-H. Synaptic concentration of dopamine in rat striatal slices in  
671 relationship to [3H]raclopride binding to the dopamine D2 receptor. *Archives of  
672 Pharmacal Research*. 2000;23(4):360-6. doi: 10.1007/BF02975448.
- 673 22. Kellendonk C, Simpson EH, Polan HJ, Malleret G, Vronskaya S, Winiger V, et  
674 al. Transient and Selective Overexpression of Dopamine D2 Receptors in the  
675 Striatum Causes Persistent Abnormalities in Prefrontal Cortex Functioning. *Neuron*.  
676 2006;49(4):603-15. doi: <https://doi.org/10.1016/j.neuron.2006.01.023>.
- 677 23. Krabbe S, Duda J, Schiemann J, Poetschke C, Schneider G, Kandel ER, et al.  
678 Increased dopamine D2 receptor activity in the striatum alters the firing pattern of  
679 dopamine neurons in the ventral tegmental area. *Proceedings of the National  
680 Academy of Sciences*. 2015;112(12):E1498-E506. doi: 10.1073/pnas.1500450112.
- 681 24. Duvarci S, Simpson EH, Schneider G, Kandel ER, Roeper J, Sigurdsson T.  
682 Impaired recruitment of dopamine neurons during working memory in mice with  
683 striatal D2 receptor overexpression. *Nature Communications*. 2018;9(1):2822. doi:  
684 10.1038/s41467-018-05214-4.
- 685 25. Shotbolt P, Tziortzi AC, Searle GE, Colasanti A, van der Aart J, Abanades S,  
686 et al. Within-subject comparison of [(11)C]-(+)-PHNO and [(11)C]raclopride sensitivity  
687 to acute amphetamine challenge in healthy humans. *Journal of cerebral blood flow  
688 and metabolism : official journal of the International Society of Cerebral Blood Flow  
689 and Metabolism*. 2012;32(1):127-36. Epub 08/31. doi: 10.1038/jcbfm.2011.115.  
690 PubMed PMID: 21878947.
- 691 26. Celada P, Puig MV, Artigas F. Serotonin modulation of cortical neurons and  
692 networks. *Front Integr Neurosci*. 2013;7:25-. doi: 10.3389/fnint.2013.00025. PubMed  
693 PMID: 23626526.

- 694 27. Avery MC, Krichmar JL. Improper activation of D1 and D2 receptors leads to  
695 excess noise in prefrontal cortex. *Front Comput Neurosci*. 2015;9:31-. doi:  
696 10.3389/fncom.2015.00031. PubMed PMID: 25814948.
- 697 28. Puig MV, Antzoulatos EG, Miller EK. Prefrontal dopamine in associative  
698 learning and memory. *Neuroscience*. 2014;282:217-29. Epub 09/18. doi:  
699 10.1016/j.neuroscience.2014.09.026. PubMed PMID: 25241063.
- 700 29. Durstewitz D, Seamans JK, Sejnowski TJ. Dopamine-mediated stabilization of  
701 delay-period activity in a network model of prefrontal cortex. *J Neurophysiol*.  
702 2000;83(3):1733-50. Epub 2000/03/11. doi: 10.1152/jn.2000.83.3.1733. PubMed  
703 PMID: 10712493.
- 704 30. Kahnt T, Weber SC, Haker H, Robbins TW, Tobler PN. Dopamine D2-  
705 Receptor Blockade Enhances Decoding of Prefrontal Signals in Humans. *The*  
706 *Journal of Neuroscience*. 2015;35(9):4104-11. doi: 10.1523/jneurosci.4182-14.2015.
- 707 31. Azmitia EC, Segal M. An autoradiographic analysis of the differential  
708 ascending projections of the dorsal and median raphe nuclei in the rat. *The Journal*  
709 *of comparative neurology*. 1978;179(3):641-67. Epub 1978/06/01. doi:  
710 10.1002/cne.901790311. PubMed PMID: 565370.
- 711 32. Navailles S, De Deurwaerdère P. Presynaptic control of serotonin on striatal  
712 dopamine function. *Psychopharmacology*. 2011;213(2):213-42. doi: 10.1007/s00213-  
713 010-2029-y.
- 714 33. Zhou FC, Lesch KP, Murphy DL. Serotonin uptake into dopamine neurons via  
715 dopamine transporters: a compensatory alternative. *Brain Res*. 2002;942(1-2):109-  
716 19. Epub 2002/05/29. doi: 10.1016/s0006-8993(02)02709-9. PubMed PMID:  
717 12031859.
- 718 34. Bonsi P, Cuomo D, Ding J, Sciamanna G, Ulrich S, Tschertter A, et al.  
719 Endogenous serotonin excites striatal cholinergic interneurons via the activation of 5-  
720 HT 2C, 5-HT6, and 5-HT7 serotonin receptors: implications for extrapyramidal side  
721 effects of serotonin reuptake inhibitors. *Neuropsychopharmacology*.  
722 2007;32(8):1840-54. Epub 2007/01/05. doi: 10.1038/sj.npp.1301294. PubMed PMID:  
723 17203014.
- 724 35. Han S, Cui Q, Guo X, Fan Y-S, Guo J, Zong X, et al. Disconnectivity between  
725 the raphe nucleus and subcortical dopamine-related regions contributes altered  
726 salience network in schizophrenia. *Schizophrenia Research*. 2020;216:382-8. doi:  
727 <https://doi.org/10.1016/j.schres.2019.11.006>.
- 728 36. Sorg C, Manoliu A, Neufang S, Myers N, Peters H, Schwerthöffer D, et al.  
729 Increased Intrinsic Brain Activity in the Striatum Reflects Symptom Dimensions in  
730 Schizophrenia. *Schizophrenia Bulletin*. 2013;39(2):387-95. doi:  
731 10.1093/schbul/sbr184.
- 732 37. Parsey RV, Hastings RS, Oquendo MA, Huang YY, Simpson N, Arcement J,  
733 et al. Lower serotonin transporter binding potential in the human brain during major  
734 depressive episodes. *Am J Psychiatry*. 2006;163(1):52-8. doi:  
735 10.1176/appi.ajp.163.1.52. PubMed PMID: 16390889.
- 736 38. Willeit M, Sitte HH, Thierry N, Michalek K, Praschak-Rieder N, Zill P, et al.  
737 Enhanced serotonin transporter function during depression in seasonal affective  
738 disorder. *Neuropsychopharmacology*. 2008;33(7):1503-13. doi:  
739 10.1038/sj.npp.1301560. PubMed PMID: 17882235.
- 740 39. Newberg AB, Amsterdam JD, Wintering N, Shults J. Low brain serotonin  
741 transporter binding in major depressive disorder. *Psychiatry Res*. 2012;202(2):161-7.  
742 Epub 06/12. doi: 10.1016/j.psychres.2011.12.015. PubMed PMID: 22698760.
- 743 40. Lanzenberger R, Kranz GS, Haeusler D, Akimova E, Savli M, Hahn A, et al.  
744 Prediction of SSRI treatment response in major depression based on serotonin



- 745 transporter interplay between median raphe nucleus and projection areas.  
746 Neuroimage. 2012;63(2):874-81. Epub 2012/07/26. doi:  
747 10.1016/j.neuroimage.2012.07.023. PubMed PMID: 22828162.
- 748 41. Biskup CS, Sánchez CL, Arrant A, Van Swearingen AED, Kuhn C, Zepf FD.  
749 Effects of Acute Tryptophan Depletion on Brain Serotonin Function and  
750 Concentrations of Dopamine and Norepinephrine in C57BL/6J and BALB/cJ Mice.  
751 PLOS ONE. 2012;7(5):e35916. doi: 10.1371/journal.pone.0035916.
- 752 42. Moja EA, Cipolla P, Castoldi D, Tofanetti O. Dose-response decrease in  
753 plasma tryptophan and in brain tryptophan and serotonin after tryptophan-free amino  
754 acid mixtures in rats. Life Sciences. 1989;44(14):971-6. doi:  
755 [https://doi.org/10.1016/0024-3205\(89\)90497-9](https://doi.org/10.1016/0024-3205(89)90497-9).
- 756 43. Arnone D, Wise T, Walker C, Cowen PJ, Howes O, Selvaraj S. The effects of  
757 serotonin modulation on medial prefrontal connectivity strength and stability: A  
758 pharmacological fMRI study with citalopram. Prog Neuropsychopharmacol Biol  
759 Psychiatry. 2018;84(Pt A):152-9. doi: 10.1016/j.pnpbp.2018.01.021. PubMed PMID:  
760 29409920; PubMed Central PMCID: PMC5886357.
- 761 44. Helmbold K, Zvyagintsev M, Dahmen B, Biskup CS, Bubenzer-Busch S,  
762 Gaber TJ, et al. Serotonergic modulation of resting state default mode network  
763 connectivity in healthy women. Amino Acids. 2016;48(4):1109-20. doi:  
764 10.1007/s00726-015-2137-4.
- 765 45. Wang L, Xia M, Li K, Zeng Y, Su Y, Dai W, et al. The effects of antidepressant  
766 treatment on resting-state functional brain networks in patients with major depressive  
767 disorder. Human Brain Mapping. 2015;36(2):768-78. doi: 10.1002/hbm.22663.
- 768 46. An J, Wang L, Li K, Zeng Y, Su Y, Jin Z, et al. Differential effects of  
769 antidepressant treatment on long-range and short-range functional connectivity  
770 strength in patients with major depressive disorder. Sci Rep. 2017;7(1):10214-. doi:  
771 10.1038/s41598-017-10575-9. PubMed PMID: 28860564.
- 772 47. Lemogne C, Delaveau P, Freton M, Guionnet S, Fossati P. Medial prefrontal  
773 cortex and the self in major depression. Journal of affective disorders. 2012;136(1-  
774 2):e1-e11. Epub 2010/12/28. doi: 10.1016/j.jad.2010.11.034. PubMed PMID:  
775 21185083.
- 776 48. Savitz JB, Drevets WC. Imaging phenotypes of major depressive disorder:  
777 genetic correlates. Neuroscience. 2009;164(1):300-30. doi:  
778 <https://doi.org/10.1016/j.neuroscience.2009.03.082>.
- 779 49. Savitz J, Drevets WC. Bipolar and major depressive disorder: Neuroimaging  
780 the developmental-degenerative divide. Neuroscience & Biobehavioral Reviews.  
781 2009;33(5):699-771. doi: <https://doi.org/10.1016/j.neubiorev.2009.01.004>.
- 782 50. Su Lui, M.D., Ph.D. , Qizhu Wu, Ph.D. , Lihua Qiu, M.D. , Xun Yang, Ph.D. ,  
783 Weihong Kuang, M.D. , Raymond C.K. Chan, Ph.D. , et al. Resting-State Functional  
784 Connectivity in Treatment-Resistant Depression. American Journal of Psychiatry.  
785 2011;168(6):642-8. doi: 10.1176/appi.ajp.2010.10101419. PubMed PMID: 21362744.
- 786 51. Manoliu A, Meng C, Brandl F, Doll A, Tahmasian M, Scherr M, et al. Insular  
787 dysfunction within the salience network is associated with severity of symptoms and  
788 aberrant inter-network connectivity in major depressive disorder. Frontiers in Human  
789 Neuroscience. 2014;7(930). doi: 10.3389/fnhum.2013.00930.
- 790 52. Gerfen CR, Surmeier DJ. Modulation of striatal projection systems by  
791 dopamine. Annu Rev Neurosci. 2011;34:441-66. doi: 10.1146/annurev-neuro-  
792 061010-113641. PubMed PMID: 21469956.
- 793 53. Challis C, Berton O. Top-Down Control of Serotonin Systems by the Prefrontal  
794 Cortex: A Path toward Restored Socioemotional Function in Depression. ACS Chem

- 795 Neurosci. 2015;6(7):1040-54. Epub 03/17. doi: 10.1021/acschemneuro.5b00007.  
796 PubMed PMID: 25706226.
- 797 54. Ott T, Nieder A. Dopamine and Cognitive Control in Prefrontal Cortex. Trends  
798 Cogn Sci. 2019;23(3):213-34. doi: 10.1016/j.tics.2018.12.006. PubMed PMID:  
799 30711326.
- 800 55. Ciranna L. Serotonin as a modulator of glutamate- and GABA-mediated  
801 neurotransmission: implications in physiological functions and in pathology. Curr  
802 Neuropharmacol. 2006;4(2):101-14. doi: 10.2174/157015906776359540. PubMed  
803 PMID: 18615128.
- 804 56. Hjorth OR, Frick A, Gingnell M, Hoppe JM, Faria V, Hultberg S, et al.  
805 Expression and co-expression of serotonin and dopamine transporters in social  
806 anxiety disorder: a multitracer positron emission tomography study. Molecular  
807 Psychiatry. 2019. doi: 10.1038/s41380-019-0618-7.
- 808 57. Fischer AG, Ullsperger M. An Update on the Role of Serotonin and its  
809 Interplay with Dopamine for Reward. Frontiers in Human Neuroscience.  
810 2017;11(484). doi: 10.3389/fnhum.2017.00484.
- 811 58. Wang H-L, Zhang S, Qi J, Wang H, Cachope R, Mejias-Aponte CA, et al.  
812 Dorsal Raphe Dual Serotonin-Glutamate Neurons Drive Reward by Establishing  
813 Excitatory Synapses on VTA Mesoaccumbens Dopamine Neurons. Cell Rep.  
814 2019;26(5):1128-42.e7. doi: 10.1016/j.celrep.2019.01.014. PubMed PMID:  
815 30699344.
- 816 59. Pollak Dorocic I, Fürth D, Xuan Y, Johansson Y, Pozzi L, Silberberg G, et al. A  
817 Whole-Brain Atlas of Inputs to Serotonergic Neurons of the Dorsal and Median  
818 Raphe Nuclei. Neuron. 2014;83(3):663-78. doi:  
819 <https://doi.org/10.1016/j.neuron.2014.07.002>.
- 820 60. Vazquez-Borsetti P, Cortes R, Artigas F. Pyramidal neurons in rat prefrontal  
821 cortex projecting to ventral tegmental area and dorsal raphe nucleus express 5-HT<sub>2A</sub>  
822 receptors. Cereb Cortex. 2009;19(7):1678-86. Epub 2008/11/26. doi:  
823 10.1093/cercor/bhn204. PubMed PMID: 19029064; PubMed Central PMCID:  
824 PMC2693622.
- 825 61. Harte M, O'Connor WT. Evidence for a differential medial prefrontal dopamine  
826 D1 and D2 receptor regulation of local and ventral tegmental glutamate and GABA  
827 release: A dual probe microdialysis study in the awake rat. Brain Research.  
828 2004;1017(1):120-9. doi: <https://doi.org/10.1016/j.brainres.2004.05.027>.
- 829 62. Hutchison RM, Hutchison M, Manning KY, Menon RS, Everling S. Isoflurane  
830 induces dose-dependent alterations in the cortical connectivity profiles and dynamic  
831 properties of the brain's functional architecture. Human Brain Mapping.  
832 2014;35(12):5754-75. doi: 10.1002/hbm.22583.
- 833 63. Ionescu TM, Amend M, Hafiz R, Biswal BB, Wehrl HF, Herfert K, et al.  
834 Elucidating the complementarity of resting-state networks derived from dynamic  
835 [18F]FDG and hemodynamic fluctuations using simultaneous small-animal PET/MRI.  
836 NeuroImage. 2021;236:118045. doi:  
837 <https://doi.org/10.1016/j.neuroimage.2021.118045>.
- 838 64. McCormick PN, Ginovart N, Wilson AA. Isoflurane anaesthesia differentially  
839 affects the amphetamine sensitivity of agonist and antagonist D2/D3 positron  
840 emission tomography radiotracers: implications for in vivo imaging of dopamine  
841 release. Mol Imaging Biol. 2011;13(4):737-46. Epub 2010/08/04. doi:  
842 10.1007/s11307-010-0380-3. PubMed PMID: 20680481.
- 843 65. Whittington RA, Virag L. Isoflurane decreases extracellular serotonin in the  
844 mouse hippocampus. Anesthesia and analgesia. 2006;103(1):92-8, table of contents.

- 845 Epub 2006/06/23. doi: 10.1213/01.ane.0000221488.48352.61. PubMed PMID:  
846 16790633.
- 847 66. Daws LC, Gould GG. Ontogeny and regulation of the serotonin transporter:  
848 providing insights into human disorders. *Pharmacology & therapeutics*.  
849 2011;131(1):61-79. Epub 04/05. doi: 10.1016/j.pharmthera.2011.03.013. PubMed  
850 PMID: 21447358.
- 851 67. Olsen CM. Natural rewards, neuroplasticity, and non-drug addictions.  
852 *Neuropharmacology*. 2011;61(7):1109-22. Epub 04/01. doi:  
853 10.1016/j.neuropharm.2011.03.010. PubMed PMID: 21459101.
- 854 68. Judenhofer MS, Wehrl HF, Newport DF, Catana C, Siegel SB, Becker M, et al.  
855 Simultaneous PET-MRI: a new approach for functional and morphological imaging.  
856 *Nat Med*. 2008;14(4):459-65. Epub 2008/04/01. doi: nm1700 [pii]  
857 10.1038/nm1700 [doi]. PubMed PMID: 18376410.
- 858 69. Amend M, Ionescu TM, Di X, Pichler BJ, Biswal BB, Wehrl HF. Functional  
859 resting-state brain connectivity is accompanied by dynamic correlations of  
860 application-dependent [(18)F]FDG PET-tracer fluctuations. *Neuroimage*.  
861 2019;196:161-72. Epub 2019/04/15. doi: 10.1016/j.neuroimage.2019.04.034.  
862 PubMed PMID: 30981858.
- 863 70. Chuang KH, Lee HL, Li Z, Chang WT, Nasrallah FA, Yeow LY, et al.  
864 Evaluation of nuisance removal for functional MRI of rodent brain. *Neuroimage*.  
865 2019;188:694-709. doi: 10.1016/j.neuroimage.2018.12.048. PubMed PMID:  
866 30593905.
- 867 71. Wehrl HF, Hossain M, Lankes K, Liu CC, Bezrukov I, Martirosian P, et al.  
868 Simultaneous PET-MRI reveals brain function in activated and resting state on  
869 metabolic, hemodynamic and multiple temporal scales. *Nat Med*. 2013;19(9):1184-9.  
870 doi: 10.1038/nm.3290. PubMed PMID: 23975025.
- 871 72. Matthew Brett J-LA, Romain Valabregue, Jean-Baptiste Poline. Region of  
872 interest analysis using an SPM toolbox. 8th International Conference on Functional  
873 Mapping of the Human Brain. Sendai, Japan June 2-6, 2002.
- 874 73. Rubinov M, Sporns O. Complex network measures of brain connectivity: uses  
875 and interpretations. *Neuroimage*. 2010;52(3):1059-69. doi:  
876 10.1016/j.neuroimage.2009.10.003. PubMed PMID: 19819337.
- 877 74. Turkheimer FE, Selvaraj S, Hinz R, Murthy V, Bhagwagar Z, Grasby P, et al.  
878 Quantification of ligand PET studies using a reference region with a displaceable  
879 fraction: application to occupancy studies with [(11)C]-DASB as an example. *Journal*  
880 *of cerebral blood flow and metabolism : official journal of the International Society of*  
881 *Cerebral Blood Flow and Metabolism*. 2012;32(1):70-80. Epub 08/03. doi:  
882 10.1038/jcbfm.2011.108. PubMed PMID: 21811290.
- 883 75. Walker M, Ehrlichmann W, Stahlschmidt A, Pichler BJ, Fischer K. In Vivo  
884 Evaluation of 11C-DASB for Quantitative SERT Imaging in Rats and Mice. *J Nucl*  
885 *Med*. 2016;57(1):115-21. Epub 2015/10/31. doi: 10.2967/jnumed.115.163683.  
886 PubMed PMID: 26514178.

## 887 **Acknowledgements**

888 We thank Dr. Julia Mannheim, Dr. Rebecca Rock, Dr. Neele Hübner, Dr. Andreas  
889 Dieterich, Ines Herbon, Stacy Huang, Funda Cay, Linda Schramm and Sandro  
890 Aidone (Werner Siemens Imaging Center, Department of Preclinical Imaging,

891 University of Tuebingen) for their technical and administrative support. We thank the  
892 Radiopharmacy department (Werner Siemens Imaging Center, University of  
893 Tuebingen) for the tracer production. This study is also part of the PhD thesis of  
894 Tudor Ionescu.

## 895 **Funding**

- 896 • Bundesministerium für Bildung und Forschung (BMBF, Grant No. 01GQ1415)
- 897 to BJP and HFW
- 898 • Werner Siemens Foundation to BJP
- 899 • National Institute of Health (NIH, Grant No. R01 DA038895) to BBB

## 900 **Author contributions**

- 901 • Conceptualization: TI, BBB, HFW
- 902 • Methodology: TI, RH
- 903 • Software: TI, RH
- 904 • Validation: TI
- 905 • Formal analysis: TI
- 906 • Investigation: TI, MA
- 907 • Resources: BJP
- 908 • Data curation: TI
- 909 • Writing – original draft: TI
- 910 • Writing – review and editing: MA, RH, BBB, AM, BJP, HFW, KH
- 911 • Visualization: TI, KH
- 912 • Supervision: BJP, HFW, BBB, KH
- 913 • Project administration: BJP, HFW, BBB, KH
- 914 • Funding acquisition: BJP, HFW, BBB

## 915 **Competing interests**

916 The authors declare no conflict of interest.

## 917 **Data availability**

918 The original dataset will be made available upon request.

919

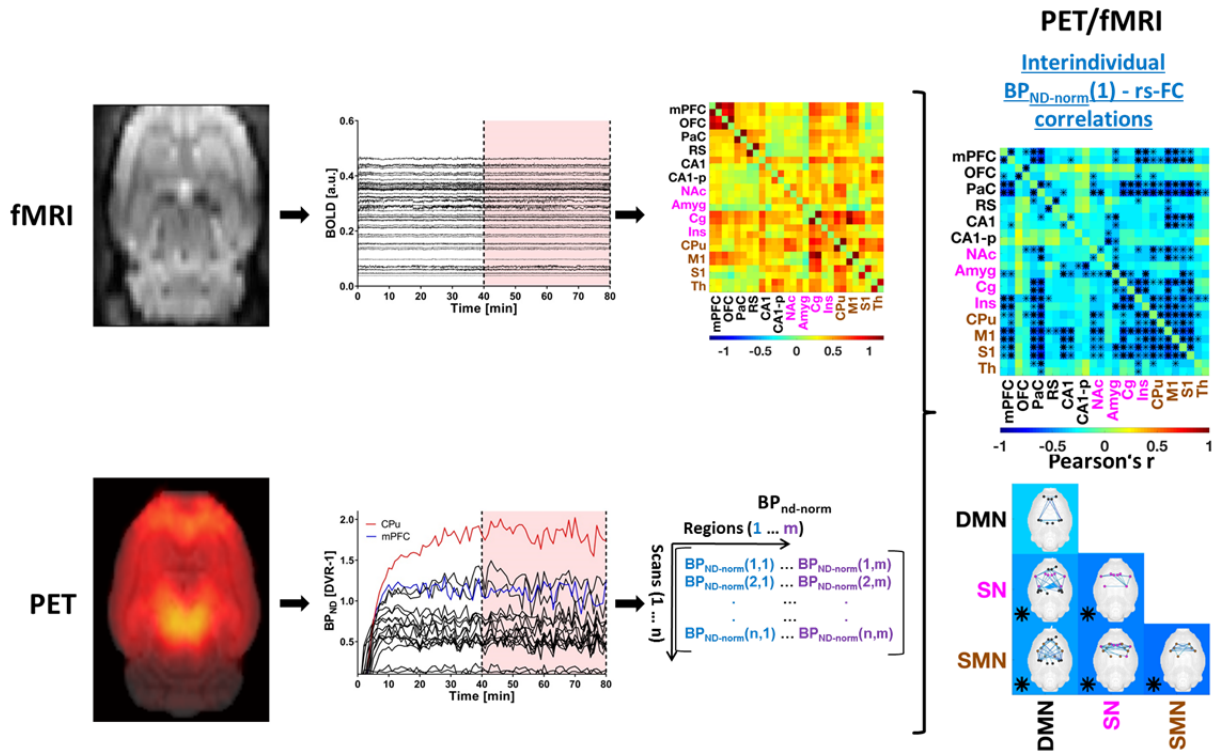

920

921 **Figure 1: PET/fMRI data analysis following preprocessing.** fMRI: regional BOLD time-courses  
 922 were extracted from each scan and subject and rs-FC matrices were computed. PET: regional DVR-1  
 923 values were extracted from 40 to 80 min after tracer injection for each scan and subsequently  
 924 normalized to whole brain values. PET-fMRI: For every region the correlations of its subject-wise  
 925 BP<sub>ND</sub>-norm values and every subject-wise rs-FC edge were calculated, resulting in inter-individual  
 926 correlation matrices per region between respective PET tracer binding and rs-FC.

927



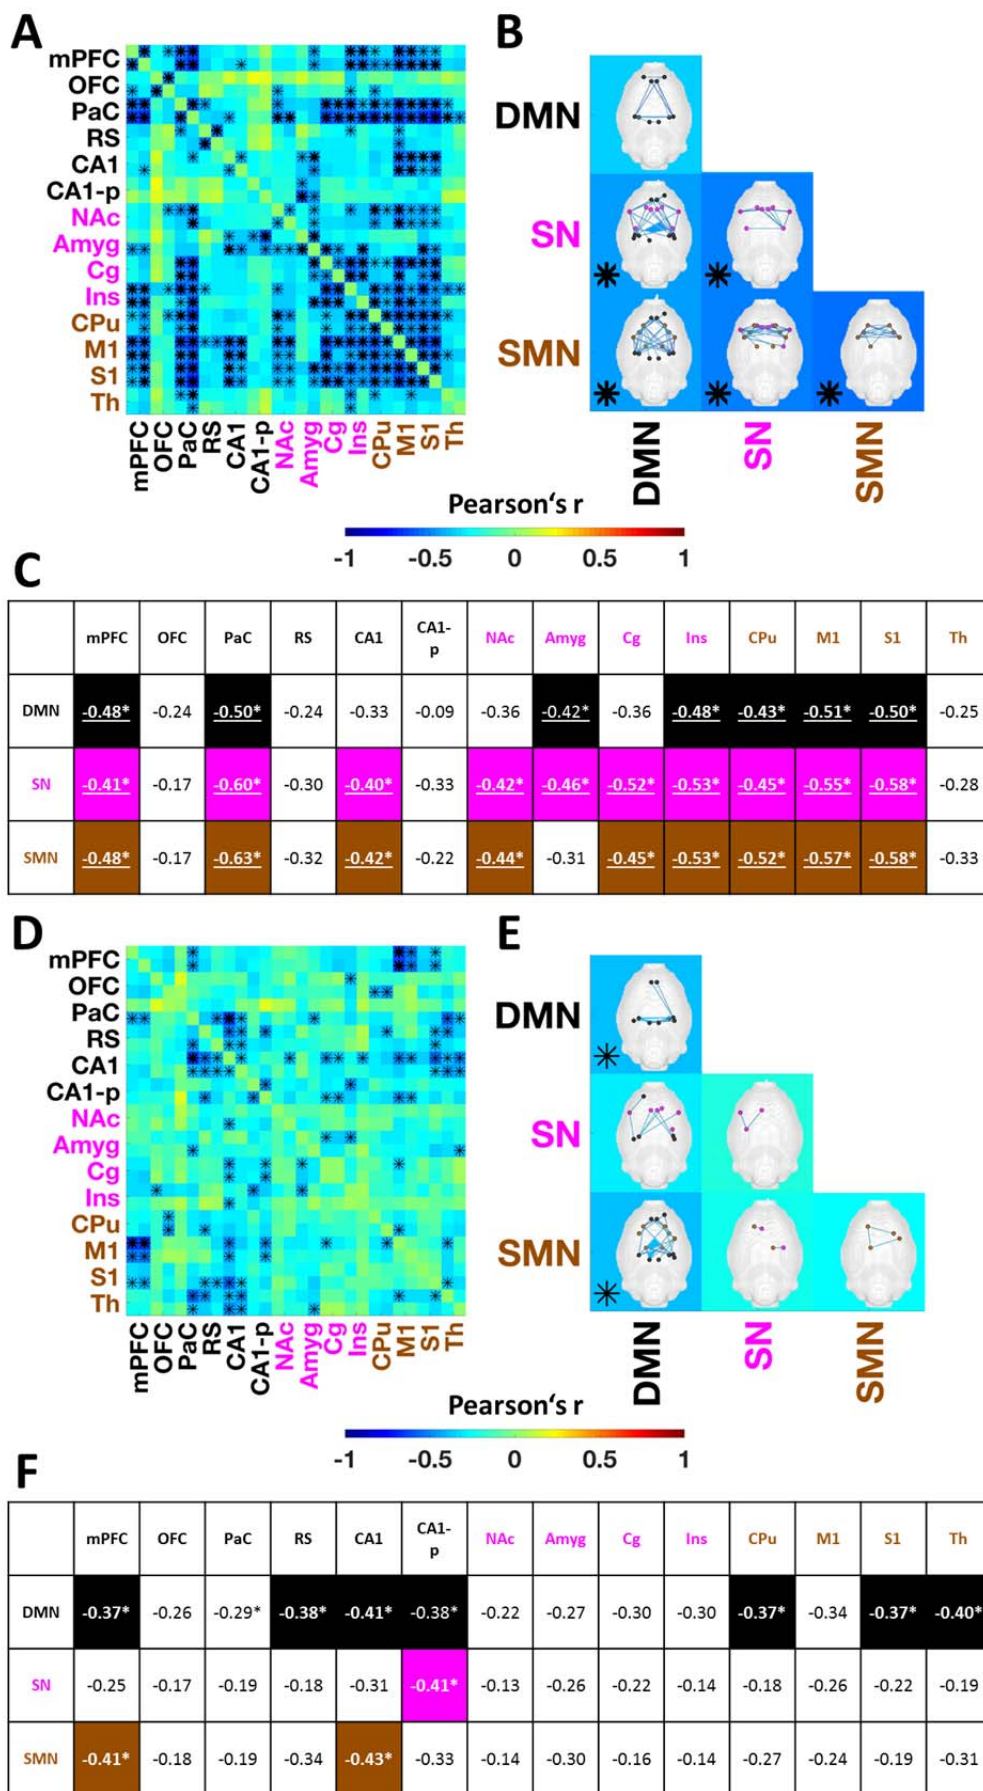

929 **Figure 2: Correlations between D2R availability in the CPu and mPFC and rs-FC. (A)** The  
930 correlation matrix indicates all correlations between CPu [<sup>11</sup>C]raclopride BP<sub>ND-norm</sub> and pairwise rs-FC  
931 values between regions comprising the DMN, SN and SMN. DMN regions are depicted in black, SN  
932 regions in magenta and SMN regions in brown color. \* indicates statistically significant correlations ( $p$   
933  $< 0.05$ , bold asterisks indicate correlations surviving FDR correction). **(B)** Matrix indicating correlations  
934 between CPu [<sup>11</sup>C]raclopride BP<sub>ND-norm</sub> and within-network or between-network connectivity strengths  
935 for the DMN, SN and SMN. \* indicates statistically significant correlations ( $p < 0.05$ , bold asterisks  
936 indicate correlations surviving FDR correction). The brain maps depict the within-network or between-  
937 network edges significantly correlating with CPu BP<sub>ND-norm</sub> values. **(C)** Table indicating the correlations  
938 (Pearson's  $r$ ) of CPu [<sup>11</sup>C]raclopride BP<sub>ND-norm</sub> and the rs-FC strengths of each analyzed region  
939 (averaged between left and right hemisphere) to the DMN, SN and SMN. Significant correlations are  
940 highlighted by the underlying color (DMN – black, SN – magenta, SMN - brown) and asterisks.  
941 Correlations surviving FDR correction are underlined. **(D)** The correlation matrix indicates all  
942 correlations between mPFC [<sup>11</sup>C]raclopride BP<sub>ND-norm</sub> values and pairwise rs-FC values between  
943 regions comprising the DMN, SN and SMN. DMN regions are depicted in black, SN regions in  
944 magenta and SMN regions in brown color. \* indicates statistically significant correlations ( $p < 0.05$ ,  
945 bold asterisks indicate correlations surviving FDR correction). **(E)** Matrix indicating correlations  
946 between mPFC [<sup>11</sup>C]raclopride BP<sub>ND-norm</sub> and within-network or between-network connectivity  
947 strengths for the DMN, SN and SMN. \* indicates statistically significant correlations ( $p < 0.05$ ,  
948 uncorrected). The brain maps depict the within-network or between-network edges significantly  
949 correlating with mPFC BP<sub>ND-norm</sub> values. **(F)** Table indicating the correlations of mPFC [<sup>11</sup>C]raclopride  
950 BP<sub>ND-norm</sub> and the rs-FC strengths of each analyzed region (averaged between left and right  
951 hemisphere) to the DMN, SN and SMN. Significant correlations are highlighted by the underlying color  
952 (DMN – black, SN – magenta, SMN - brown) and asterisks ( $p < 0.05$ , uncorrected). Abbreviations:  
953 D2R = D2 receptor, BP<sub>ND-norm</sub> = normalized binding potential, rs-FC = resting-state functional  
954 connectivity, CPu = caudate putamen, mPFC = medial prefrontal cortex, DMN = default-mode  
955 network, SN = salience network, SMN = sensorimotor network. For a list of abbreviations of all regions  
956 please refer to *Supplementary Table 1*.



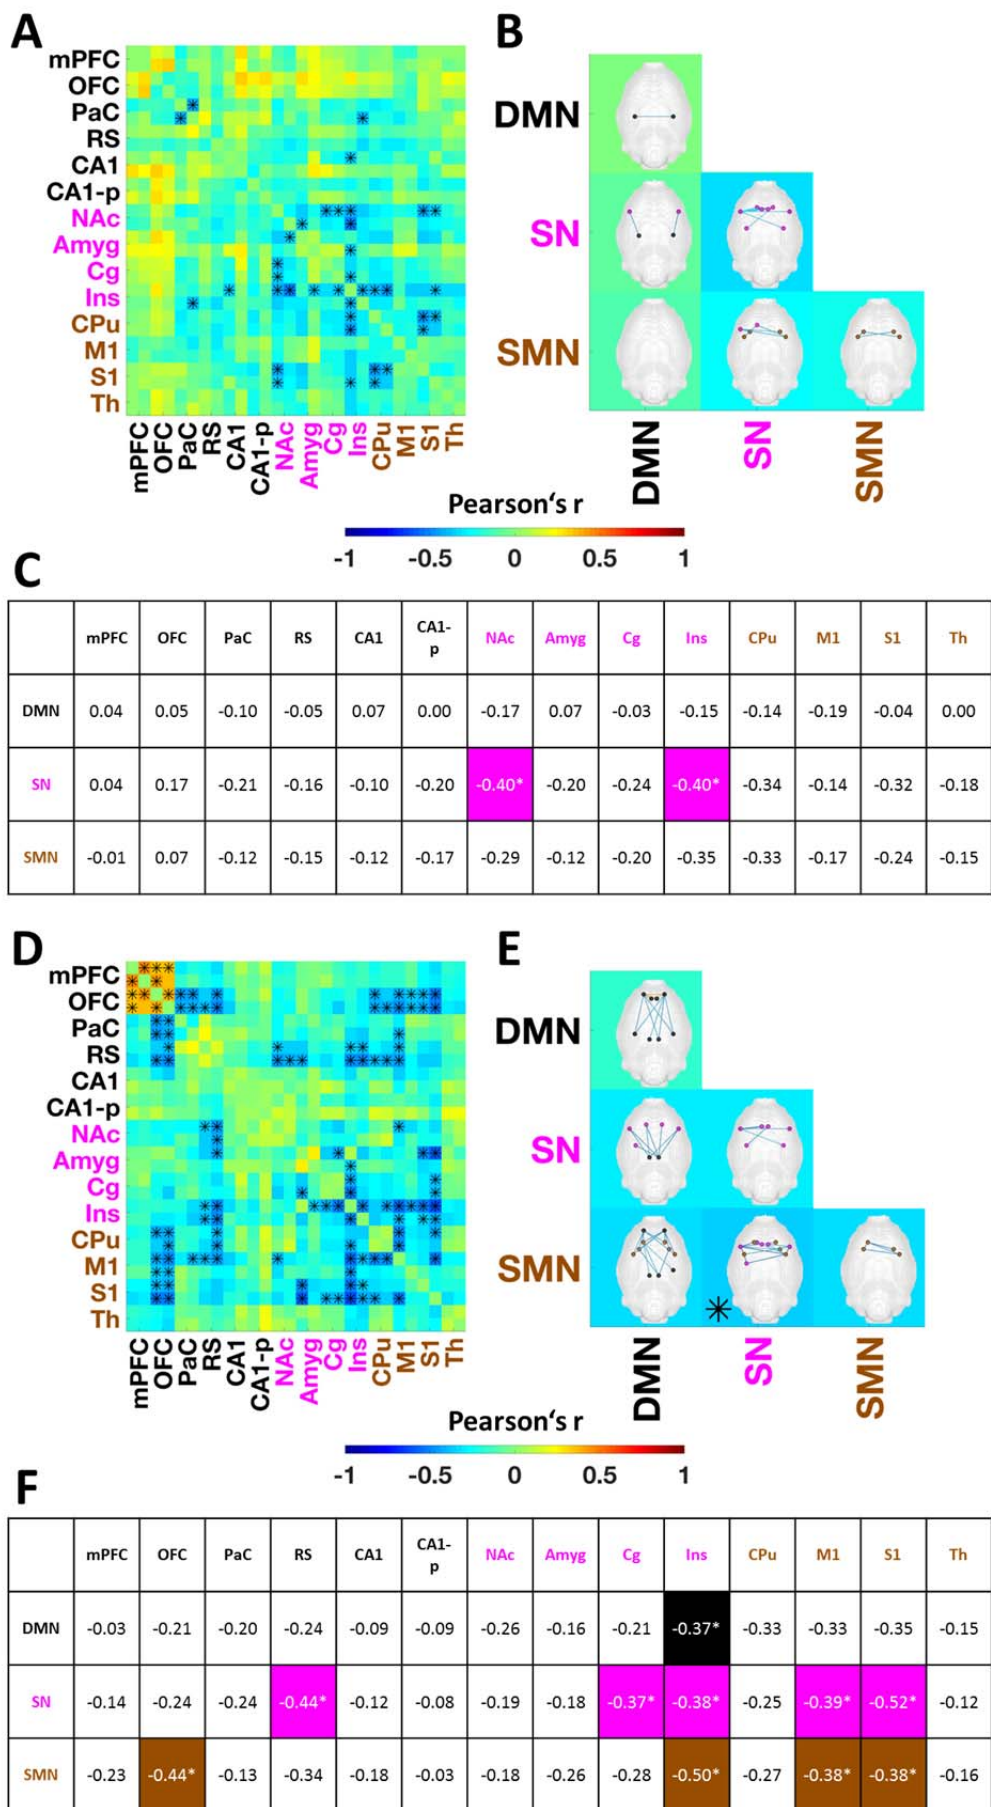

958 **Figure 3: Correlations between SERT availabilities in the CPu and mPFC and rs-FC. (A)** The  
959 correlation matrix indicates all correlations between CPu [<sup>11</sup>C]DASB BP<sub>ND-norm</sub> values and pairwise rs-  
960 FC values between regions comprising the DMN, SN and SMN. DMN regions are depicted in black,  
961 SN regions in magenta and SMN regions in brown color. \* indicates statistically significant correlations  
962 ( $p < 0.05$ , uncorrected). **(B)** Matrix indicating correlations between CPu [<sup>11</sup>C]DASB BP<sub>ND-norm</sub> and  
963 within-network or between-network connectivity strengths for the DMN, SN and SMN. \* indicates  
964 statistically significant correlations ( $p < 0.05$ , uncorrected). The brain maps depict the within-network  
965 or between-network edges significantly correlating with CPu [<sup>11</sup>C]DASB BP<sub>ND-norm</sub> values. **(C)** Table  
966 indicating the correlations of CPu [<sup>11</sup>C]DASB BP<sub>ND-norm</sub> and the rs-FC strengths of each analyzed  
967 region (averaged between left and right hemisphere) to the DMN, SN and SMN. Significant  
968 correlations are highlighted by the underlying color (DMN – black, SN – magenta, SMN - brown) and  
969 asterisks ( $p < 0.05$ ). **(D)** The correlation matrix indicates all correlations between mPFC [<sup>11</sup>C]DASB  
970 BP<sub>ND-norm</sub> values and pairwise rs-FC values between regions comprising the DMN, SN and SMN. DMN  
971 regions are depicted in black, SN regions in magenta and SMN regions in brown color. \* indicates  
972 statistically significant correlations ( $p < 0.05$ , uncorrected). **(E)** Matrix indicating correlations between  
973 mPFC [<sup>11</sup>C]DASB BP<sub>ND-norm</sub> and within-network or between-network connectivity strengths for the  
974 DMN, SN and SMN. \* indicates statistically significant correlations ( $p < 0.05$ , uncorrected). The brain  
975 maps depict the within-network or between-network edges significantly correlating with mPFC  
976 [<sup>11</sup>C]DASB BP<sub>ND-norm</sub> values. **(F)** Table indicating the correlations of mPFC [<sup>11</sup>C]DASB BP<sub>ND-norm</sub> and  
977 the rs-FC strengths of each analyzed region (averaged between left and right hemisphere) to the  
978 DMN, SN and SMN. Significant correlations are highlighted by the underlying color (DMN – black, SN  
979 – magenta, SMN - brown) and asterisks ( $p < 0.05$ , uncorrected). Abbreviations: SERT = serotonin  
980 transporter, BP<sub>ND-norm</sub> = normalized binding potential, rs-FC = resting-state functional connectivity, CPu  
981 = caudate putamen, mPFC = medial prefrontal cortex, DMN = default-mode network, SN = salience  
982 network, SMN = sensorimotor network. For a list of abbreviations of all regions please refer to  
983 *Supplementary Table 1.*

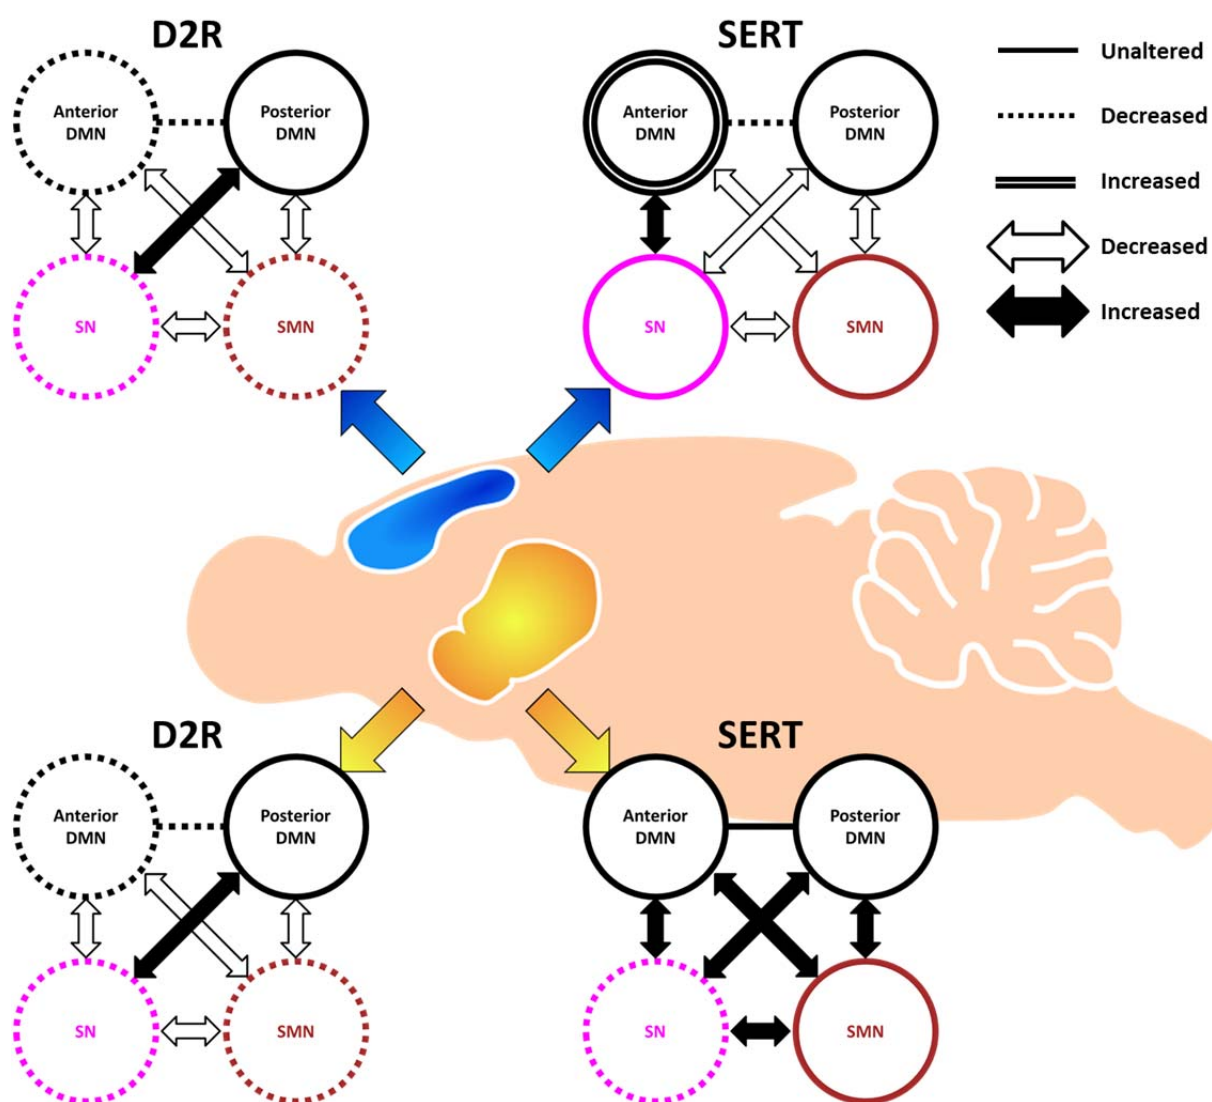

984

985 **Figure 4: Summary of the findings.** In the mPFC (blue) D2Rs are negatively correlated with  
 986 posterior DMN rs-FC and the rs-FC between DMN and SMN. SERT availability in the mPFC is  
 987 negatively correlated with rs-FC between anterior and posterior DMN, yet positively correlated with  
 988 anterior DMN rs-FC. The rs-FC between SN and SMN is also anti-correlated with medial prefrontal  
 989 SERT density. In the CPU (yellow) increasing D2R was associated with decreased rs-FC within and  
 990 between all networks except for the largely unaffected posterior DMN, while SERT availability  
 991 correlated negatively with SN rs-FC and did not correlate to rs-FC in other networks. Interrupted lines  
 992 indicate negatively correlated within-network rs-FC, empty arrows indicate negatively correlated  
 993 between-network rs-FC. Single continuous lines and full arrows indicate no correlation of within and  
 994 between-network rs-FC. Double lines indicate positive correlation of within-network rs-FC.  
 995 Abbreviations: D2R = D2 receptor, SERT = serotonin transporter, DMN = default-mode network, SN =  
 996 salience network, SMN = sensorimotor network.
